# Supplementary material for: Short‐Term Changes in Left and Right Ventricular Cardiac Magnetic Resonance Feature Tracking Strain Following Ferric Carboxymaltose in Patients With Heart Failure: A Substudy of the Myocardial‐IRON Trial
Source: PubMed Central journal article supplement — J Am Heart Assoc. 2022 Mar 18;11(7):e022214. doi: 10.1161/JAHA.121.022214 (PMC9075490; doi:10.1161/jaha.121.022214), 2022-03-18

## **SUPPLEMENTAL MATERIAL**

**Table S1.** Details of performed sequences for CMR acquisition

| <b>CMR sequence parameters</b> | <b>Cine</b>                          | <b>T2*</b>                           |
|--------------------------------|--------------------------------------|--------------------------------------|
| Pulse sequence                 | SSFP                                 | Multiecho gradient                   |
| Slice thickness                | 7 mm                                 | 8 mm                                 |
| Field of view                  | 400 x 300                            | 400 x 324                            |
| Matrix size                    | 240 x 240                            | 256 x 154                            |
| Slice oversampling             | No                                   | No                                   |
| Voxel size                     | 1.7 x 1.7 x 7 mm                     | 1.6 x 1.6 x 8 mm                     |
| Echo time                      | 1.41 ms                              | Ascending (2.65 to 21 ms)            |
| Repeat time                    | 37.40 ms                             | 800 ms                               |
| Flip angle                     | 58°                                  | 20°                                  |
| Bandwidth (Hz/Px)              | 947                                  | 814                                  |
| Acceleration                   | GRAPPA (x2)<br>No compressed-sensing | GRAPPA (x2)<br>No compressed-sensing |

GRAPPA: Generalized autocalibrating partially parallel acquisition

**Table S2.** CMR feature tracking LV strain models

| LV 3D-GLS               | Coeff. | 95% CI        | p-value |
|-------------------------|--------|---------------|---------|
| Covariates              |        |               |         |
| LV 3D-GLS at baseline   | 0.53   | 0.39 - 0.67   | 0.000   |
| Age (years) at baseline | -0.04  | -0.10 - 0.01  | 0.124   |
| Sex                     | -0.38  | -1.64 - 0.89  | 0.560   |
| 1.iron_tx               | -0.92  | -2.09 - 0.24  | 0.120   |
| 2.visit                 | -0.00  | -0.86 - 0.85  | 0.995   |
| 1.iron_tx#2.visit       | -1.38  | -2.56 - -0.19 | 0.023   |
| N                       | 97     |               |         |
| LV 3D-GCS               | Coeff. | 95% CI        | p-value |
| Covariates              |        |               |         |
| LV 3D-GCS at baseline   | 0.81   | 0.69 - 0.93   | 0.000   |
| Age (years) at baseline | 0.02   | -0.02 - 0.06  | 0.369   |
| Sex                     | 0.44   | -0.51 - 1.39  | 0.364   |
| 1.iron_tx               | -1.59  | -2.51 - -0.68 | 0.001   |
| 2.visit                 | -0.39  | -1.22 - 0.44  | 0.361   |
| 1.iron_tx#2.visit       | -0.88  | -2.02 - 0.25  | 0.128   |
| N                       | 100    |               |         |
| LV 3D-GRS               | Coeff. | 95% CI        | p-value |
| Covariates              |        |               |         |
| LV 3D-GRS at baseline   | 0.59   | 0.42 - 0.77   | 0.000   |
| Age (years) at baseline | 0.02   | -0.08 - 0.12  | 0.728   |
| Sex                     | -0.89  | -3.01 - 1.23  | 0.410   |
| 1.iron_tx               | 2.14   | -0.10 - 4.38  | 0.061   |
| 2.visit                 | 0.63   | -1.62 - 2.88  | 0.584   |
| 1.iron_tx#2.visit       | 2.07   | -1.06 - 5.20  | 0.194   |
| N                       | 97     |               |         |

LV 3D-GLS: left ventricle 3D-global longitudinal strain; LV 3D-GCS: left ventricle 3D-global circumferential strain; LV 3D-GRS: left ventricle 3D-global radial strain.

**Table S3.** CMR feature tracking RV strain models

| RV 2D-GLS               | Coeff. | 95% CI        | p-value |
|-------------------------|--------|---------------|---------|
| Covariates              |        |               |         |
| RV 2D-GLS at baseline   | 0.76   | 0.59 - 0.93   | 0.000   |
| Age (years) at baseline | -0.00  | -0.10 - 0.09  | 0.947   |
| Sex                     | 1.02   | -1.01 - 3.05  | 0.326   |
| 1.iron_tx               | -1.07  | -3.03 - 0.88  | 0.281   |
| 2.visit                 | 0.41   | -1.24 - 2.05  | 0.627   |
| 1.iron_tx#2.visit       | -2.19  | -4.45 - 0.07  | 0.057   |
| N                       | 97     |               |         |
| RV 2D-GCS               | Coeff. | 95% CI        | p-value |
| Covariates              |        |               |         |
| RV 2D-GCS at baseline   | 0.73   | 0.58 - 0.88   | 0.000   |
| Age (years) at baseline | -0.07  | -0.14 - 0.01  | 0.075   |
| Sex                     | 0.45   | -1.09 - 1.99  | 0.568   |
| 1.iron_tx               | -1.05  | -2.47 - 0.36  | 0.145   |
| 2.visit                 | 1.74   | -0.02 - 3.50  | 0.052   |
| 1.iron_tx#2.visit       | -3.42  | -5.86 - -0.98 | 0.006   |
| N                       | 101    |               |         |
| RV 2D-GRS               | Coeff. | 95% CI        | p-value |
| Covariates              |        |               |         |
| RV 2D-GRS at baseline   | 0.46   | 0.29 - 0.63   | 0.000   |
| Age (years) at baseline | 0.08   | -0.09 - 0.25  | 0.367   |
| Sex                     | 0.31   | -3.39 - 4.01  | 0.869   |
| 1.iron_tx               | 0.84   | -2.68 - 4.37  | 0.639   |
| 2.visit                 | -1.30  | -3.85 - 1.24  | 0.315   |
| 1.iron_tx#2.visit       | 3.65   | 0.08 - 7.22   | 0.045   |
| N                       | 99     |               |         |

RV 2D-GLS: right ventricle 2D-global longitudinal strain; RV 2D-GCS: right ventricle 2D-global circumferential strain; RV 2D-GRS: right ventricle 2D-global radial strain.

**Table S4.** Correlations among 30-day changes LV strain parameters and changes in T2\*, TSAT, and ferritin.

|                    | $\Delta T2^*$   | $\Delta TSAT$   | $\Delta Ferritin$ |
|--------------------|-----------------|-----------------|-------------------|
| <b>Iron FCM</b>    |                 |                 |                   |
| $\Delta LV$ 3D-GLS | 0.30 (p=0.183)  | 0.06 (p=0.742)  | 0.04 (p=0.889)    |
| $\Delta LV$ 3D-GCS | 0.18 (p=0.426)  | 0.13 (p=0.561)  | -0.21 (p=0.339)   |
| $\Delta LV$ 3D-GRS | -0.42 (p=0.045) | -0.08 (p=0.751) | 0.21 (p=0.330)    |
| <b>Placebo</b>     |                 |                 |                   |
| $\Delta LV$ 3D-GLS | 0.22 (p=0.325)  | -0.20 (p=0.401) | 0.18 (p=0.436)    |
| $\Delta LV$ 3D-GCS | -0.14 (p=0.543) | -0.28 (p=0.231) | 0.19 (p=0.414)    |
| $\Delta LV$ 3D-GRS | 0.23 (p=0.330)  | 0.33 (p=0.155)  | 0.13 (p=0.573)    |

FCM: ferric carboxymaltose; LV 3D-GLS: left ventricle 3D-global longitudinal strain; LV 3D-GCS: left ventricle 3D-global circumferential strain; LV 3D-GRS: left ventricle 3D-global radial strain.

The Spearman test evaluated correlations.

**Figure S1.** Differences in LV and RV strain on CMR-FT at 7 and 30 days following the administration of ferric carboxymaltose in patients with baseline LVEF  $\leq$  40%. Values are presented as the least square means from each mixed linear regression model. All models were adjusted by the participant center (as a cluster variable), the interaction term treatment\*visit (7 and 30 days), age, sex, and the baseline (pretreatment) value of the regressed outcome. (A) LV 3D-global longitudinal strain (LV 3D-GLS). (B) LV 3D-global circumferential strain (LV 3D-GCS). (C) LV 3D-global radial strain (LV 3D-GRS). (D) RV 2D-global longitudinal strain (RV 2D-GLS). (E) RV 2D-global circumferential strain (RV 2D-GCS). (F) RV 2D-global radial strain (RV 2D-GRS). CMR-FT: cardiac magnetic resonance feature tracking.

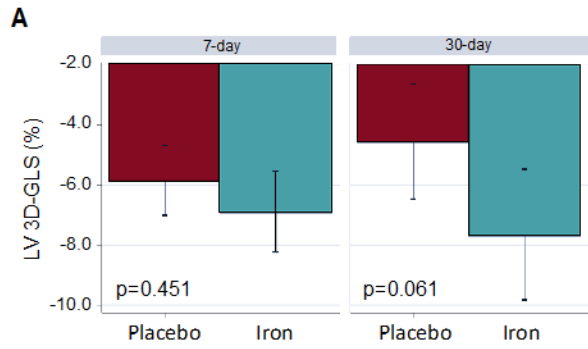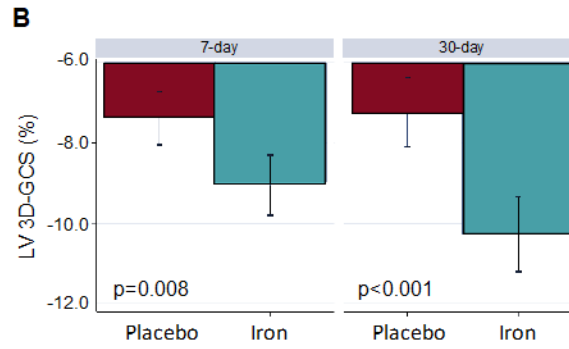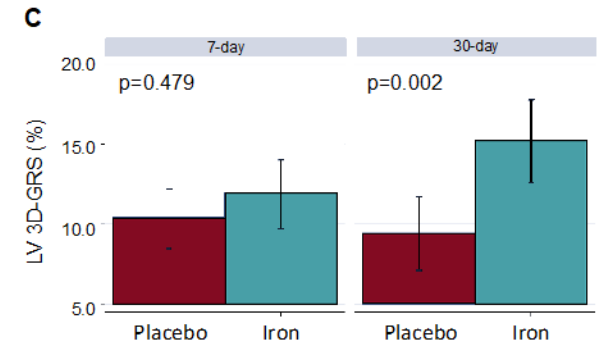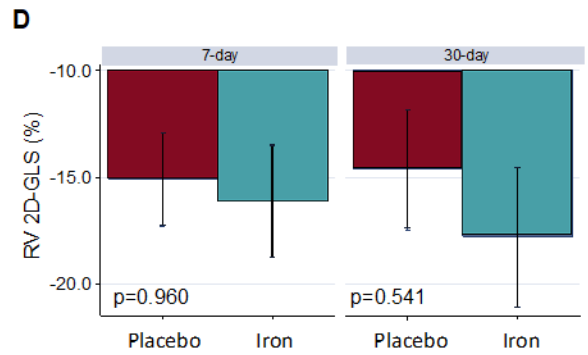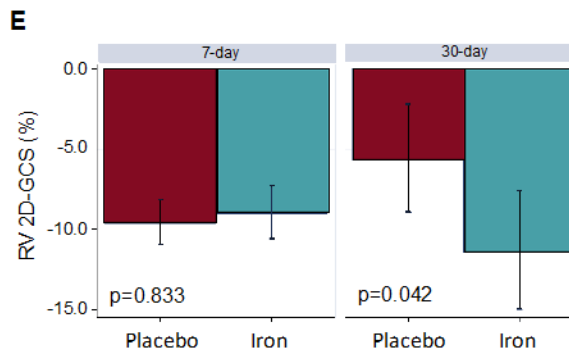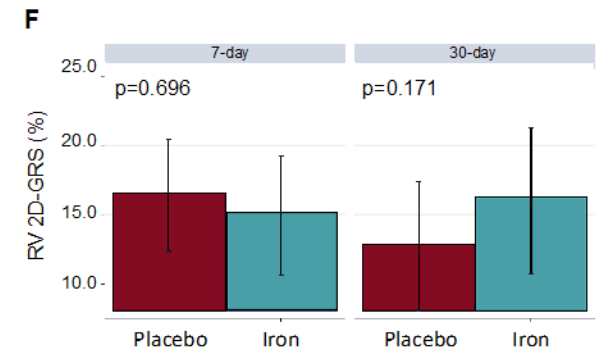

Supplement: JAH3-11-e022214-s001.pdf [file JAH3-11-e022214-s001.pdf]
